# Supplementary material for: Graphene Oxide: A Comparison of Reduction Methods
Source: MDPI journal article supplement (doi:10.3390/c9030073), 2023-07-27
Supplement: s1 [file s1]

Archive with 1 entries (1 files):
- carbon-2468784-supplementary.pdf
