# Supplementary material for: Graphene Oxide: A Comparison of Reduction Methods
Source: MDPI journal article supplement (doi:10.3390/c9030073), 2023-07-27
Supplement: s1 [file s1 › carbon-2468784-supplementary.pdf]

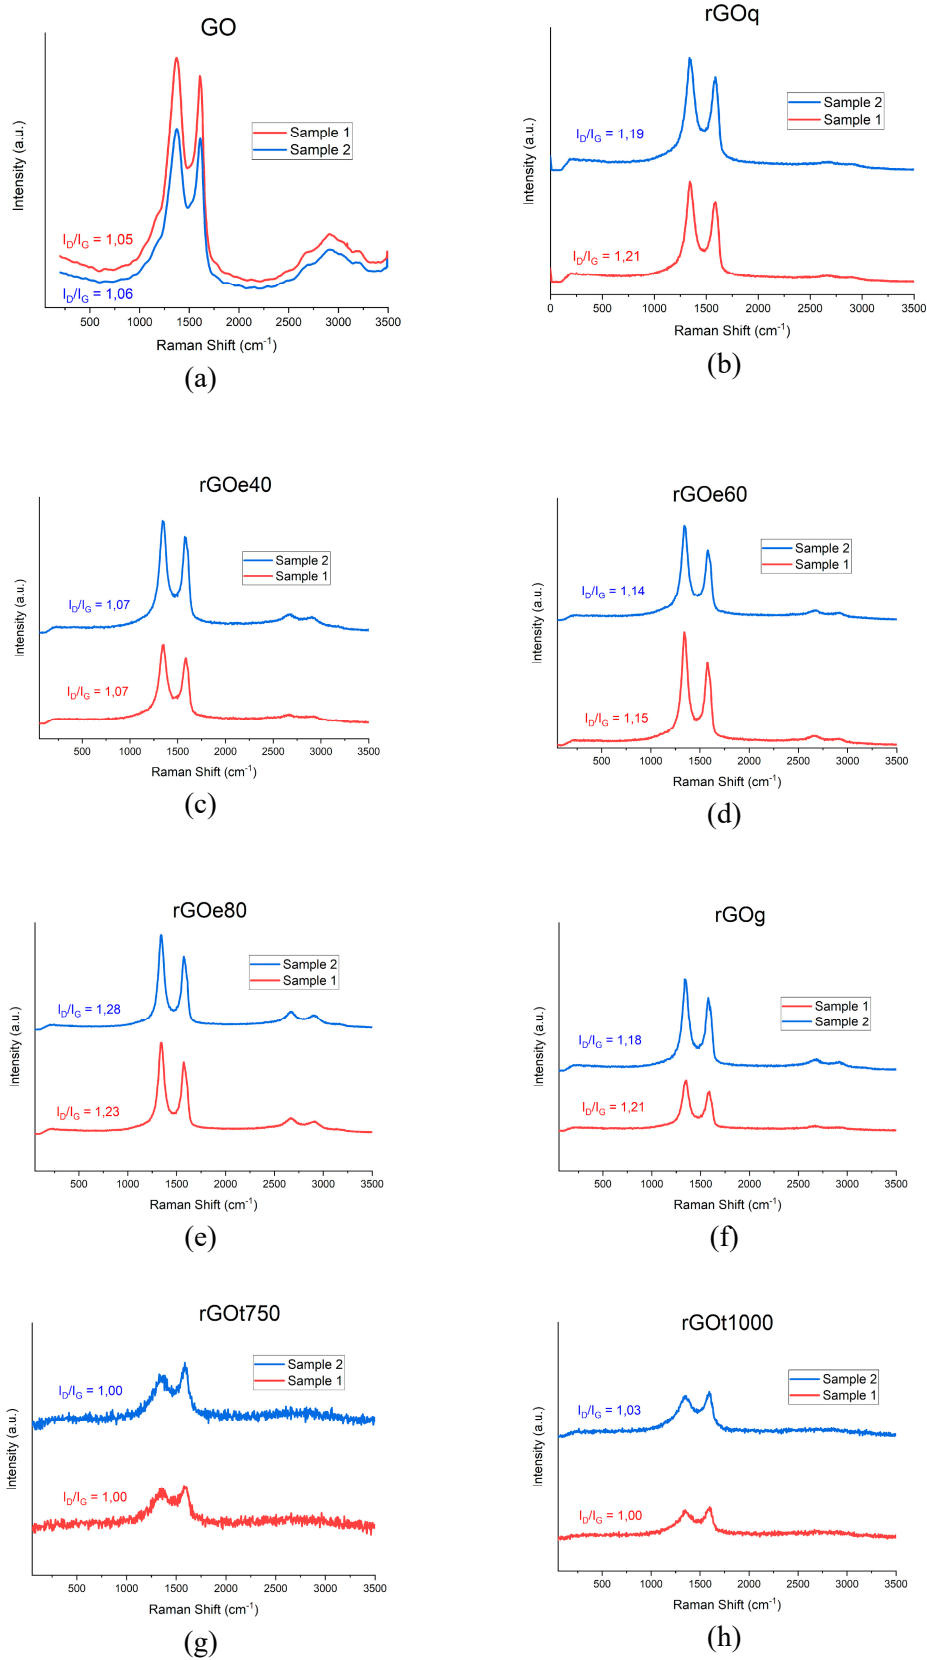

Figure S1: Raman spectra of the first and second production batches of GO and rGOs: (a) GO; (b) rGOq, (c) rGOe40, (d) rGOe60, (e) rGOe80, (f) rGOg, (g) rGOt750, and (h) rGOt1000.
